# Supplementary material for: Toxic effects of carbon quantum dots on the gut–liver axis and gut microbiota in the common carp Cyprinus carpio
Source: Royal Society of Chemistry journal article supplement (doi:10.1039/d1en00651g), 2021-11-17

## Supplementary Materials

### Toxic effects of carbon quantum dots on the gut– liver axis and gut microbiota in the common carp *Cyprinus carpio*

**Table S1** Primer sequences for qRT-PCR analysis.

| Primer             | Forward                  | Reverse                  | Acc. Num.      |
|--------------------|--------------------------|--------------------------|----------------|
| <i>40S</i>         | CCGTGGGTGACATCGTTACA     | TCAGGACATTGAACCTCACTGTCT | XM_019078334   |
| <i>occludin</i>    | GACGCCATGGATGAGTACAA     | GTGGTTGAGTTTGGCTTTCAG    | KF975606.1     |
| <i>claudin-2</i>   | CTGGAGTTGATGGGTTTCTTTTG  | AGACCTTTCATGCTTTCTACCG   | KU200691.1     |
| <i>zonula</i>      | GATATGTTTCGGAGGTGCGCT    | ATGTTGCATGGTGCTTGCTG     | KY290394.1     |
| <i>occludens-1</i> |                          |                          |                |
| <i>nrf-2</i>       | GTATGACCCAGAGACAAACC     | CCAACCACATACAGACTTCC     | XM_019124298.1 |
| <i>ho-1</i>        | GCTCATGCATATACGCGCTA     | CAGAATTCCCTTGTTGCCACT    | XM_019071460.1 |
| <i>tlr4</i>        | CGAGTCAGAACCTCAGCC       | CCTTGCTCCCCCTCATCC       | XM_019090185.1 |
| <i>myd88</i>       | CGCCGAAATGATGGACTTCAC    | TCTACTGTTGCCTCTGGACG     | HQ380208.1     |
| <i>nf-κB/p65</i>   | AGAAGAGCAACGACACCACAA    | TTGTACGGCTGGTTCTTGGTT    | MN167531.1     |
| <i>il-1β</i>       | CAAACCTGGAGCTGTCTTCGC    | CTTACCAGACGCTCTTCGAT     | AB010701.1     |
| <i>tnf-α</i>       | AGCCAGGTGTCTTCCACAT      | ATGTAGCCGCCATAGGAATCG    | XM_019088899.1 |
| <i>srebp-1c</i>    | CACGGCTCTGCTCAACGACAT    | TGCGGAGGAGACTGCTGGAA     | XM_019073316.1 |
| <i>fas</i>         | GAGAAAGTGGTGGTCGCTAAA    | CATCACGCACACCCAGAATA     | XM_019070657.1 |
| <i>mttp</i>        | CGGAGGGTGTTCCCTATTC      | TATGCGGTTCAAGTGTCTT      | XM_019122094.1 |
| <i>cpt-1α</i>      | CAGATGGAAAGTGTTGCTAATGAC | TGTGTAGAAGTTGCTGTTGACCA  | XM_019122018.1 |
| <i>hmgcr</i>       | TGGAGCAGGTCATCACGC       | GATTGGTCAGGGAGCAGTT      | XM_019073034.1 |
| <i>fxr</i>         | GGTGCTGAGGAAGGTCTG       | GTGGTGGTGGTTGAGGGT       | XM_019069273.1 |
| <i>abcg1</i>       | AGCAGACGCCGCTGTTAC       | TTCTCCACCACGGTCCTTC      | XM_019091447.1 |
| <i>abcg8</i>       | CAAGCAAACGGTCATAAAG      | TCATAGTGCCACCCTCATC      | XM_019114412.1 |
| <i>fgf19</i>       | TGTGATCCAGAGTCCAG        | GTGTCCCCTGTGCAGTTT       | XM_019066901.1 |
| <i>cyp7a1</i>      | GTGCTCTTCAGTTTGGGG       | GCAGGTTCTCGGTAGTGT       | XM_019074263.1 |
| <i>cyp27a1</i>     | AGATGTGGTCAATGCGGT       | AGCCAATGCGTGTCTCAA       | XM_019102935.1 |

**Table S2** Total bases, sequence number, and Good's coverage (i.e., sequencing depth index) from nine samples. CK: control group (CQDs at 0 mg/kg BW); C1: treatment group 1 (CQDs at 2 mg/kg BW); C2: treatment group 2 (CQDs at 20 mg/kg BW).

| <b>Samples</b> | <b>Total bases</b> | <b>Sequence number</b> | <b>Coverage</b> |
|----------------|--------------------|------------------------|-----------------|
| CK_1           | 23,362,776         | 47286                  | 0.999247        |
| CK_2           | 19,584,385         | 44921                  | 0.99913         |
| CK_3           | 20,556,309         | 50768                  | 0.999159        |
| C1_1           | 24,189,174         | 69391                  | 0.999184        |
| C1_2           | 24,954,254         | 47934                  | 0.998726        |
| C1_3           | 25,570,431         | 41146                  | 0.999349        |
| C2_1           | 22,595,429         | 45399                  | 0.998902        |
| C2_2           | 20,120,295         | 47013                  | 0.999055        |
| C2_3           | 23,749,973         | 51377                  | 0.999386        |

**Fig. S1** Mean fluorescence intensity of intestinal tissue in the control and CQD treatment groups. Data are mean  $\pm$  SEM (n = 10). P values were obtained by two-tailed Student's *t*-test using GraphPad Prism. \*\**P* < 0.01.

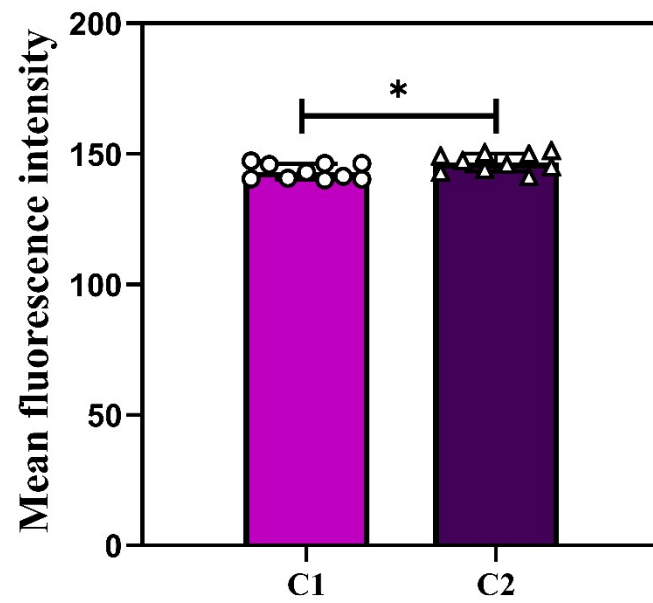

**Fig. S2** Mean fluorescence intensity of liver tissue in the control and CQD treatment groups. Data are mean  $\pm$  SEM (n = 10). P values were obtained by two-tailed Student's *t*-test using GraphPad Prism. **\*\****P* < 0.01.

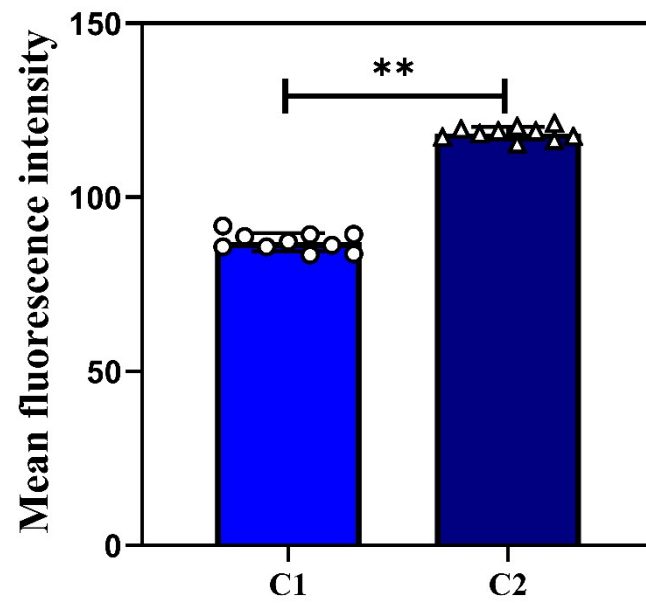

**Fig. S3** Rank–abundance curves of bacterial OTUs in the control and CQD treatment groups.

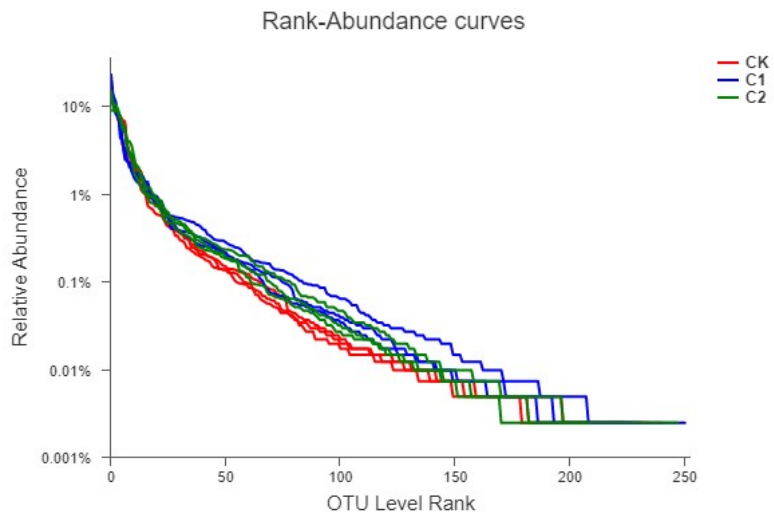

**Fig. S4** PICRUSt analysis based on clusters of orthologous groups (COGs). The functional composition of the gut microbiota metagenome was predicted by COGs for the treatment groups.

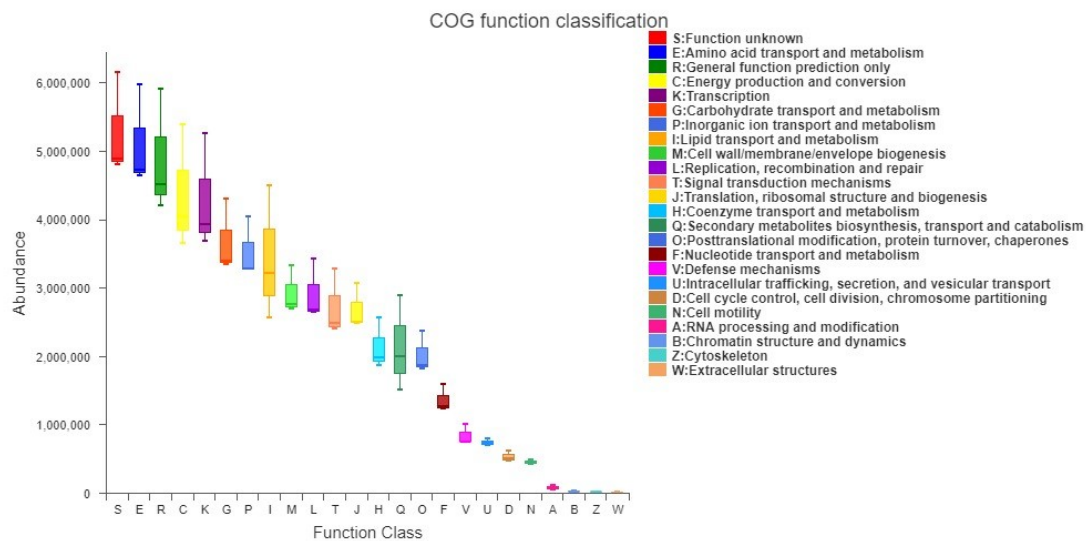

Supplement: d1en00651g1.pdf [file d1en00651g1.pdf]
